# Supplementary material
Source: PubMed Central journal article supplement (PMC10561665)
Supplement: NIHMS1932822-supplement-Supplementary_Table.pdf [file NIHMS1932822-supplement-Supplementary_Table.pdf]

## Supplementary Information:

| Study         | Database       | Search Query                                                                                                                                                                                                                                                                                                                                                                                                                                                                                                                                                                                                                                                                                                                      |
|---------------|----------------|-----------------------------------------------------------------------------------------------------------------------------------------------------------------------------------------------------------------------------------------------------------------------------------------------------------------------------------------------------------------------------------------------------------------------------------------------------------------------------------------------------------------------------------------------------------------------------------------------------------------------------------------------------------------------------------------------------------------------------------|
| Concentration | PubMed         | ((Magnetic Resonance Spectroscopy [mh] OR “Magnetic Resonance Spectroscopy” OR MRS OR MRSI OR “ <sup>1</sup> H-MRS” OR “In Vivo NMR” OR “In-Vivo NMR” OR “MR Spectroscopy” OR “MR Spectroscopy”) AND (Brain [mh] OR Neurosciences [mh] OR Neurology [mh] OR Neuroscience OR Neurosciences OR Brain OR Midbrain OR Neurology OR Cognition OR Cortical OR Hippocampus OR “Frontal Lobe” OR “Parietal Lobe” OR “Occipital Lobe” OR “Temporal Lobe” OR Amygdala OR Cortex OR Cerebellum OR Cerebrum OR “Brain Stem”) AND (Humans [mh] OR Human OR Humans) AND (Proton OR Protons OR <sup>1</sup> H OR “Hydrogen Nucleus” OR “ <sup>1</sup> H-MRS” OR “ <sup>1</sup> H MRS”) NOT (Review))                                             |
| Concentration | Web of Science | ALL=((“Magnetic Resonance Spectroscopy” OR MRS OR MRSI OR “ <sup>1</sup> H-MRS” OR “In Vivo NMR” OR “In-Vivo NMR” OR “MR Spectroscopy” OR “mrspectroscopy”) AND (Neuroscience OR Neurosciences OR Brain OR Midbrain OR Neurology OR Neuroradiology OR Cognition OR Cortical OR Hippocampus OR “Frontal Lobe” OR “Parietal Lobe” OR “Occipital Lobe” OR “Temporal Lobe” OR Amygdala OR Cortex OR Cerebellum OR Cerebrum OR “Brain Stem”) AND (Human OR Humans) AND (Proton OR Protons OR <sup>1</sup> H OR “Hydrogen Nucleus” OR “ <sup>1</sup> H-MRS” OR “ <sup>1</sup> H MRS”) NOT (Review))                                                                                                                                     |
| Concentration | Scopus         | ((“magnetic resonance spectroscopy” OR “mrs” OR “ <sup>1</sup> H-mrs” OR “mrsi” OR “NMR Spectroscopy”) AND (“human”) AND (“ <sup>1</sup> H” OR “proton” OR “ <sup>1</sup> H-mrs” OR “hydrogen nucleus”) AND (“neuroscience” OR “brain”) AND (“concentration”) AND NOT (“rat” OR “mouse” OR “mice” OR “rodent” OR “Animal” OR “Dog” OR “ex vivo” OR “ex-vivo” OR “vitro” OR “ <sup>13</sup> C” OR “ <sup>31</sup> P” OR “ <sup>23</sup> Na” OR “ <sup>17</sup> O” OR “Systematic Review”)))                                                                                                                                                                                                                                        |
| Relaxation    | PubMed         | (“T <sub>2</sub> Relaxation” OR “Transverse Relaxation” OR “Spin-spin Relaxation” OR “Carr-Purcell Meiboom-Gill”) AND (“Magnetic Resonance Spectroscopy” [mh] OR “NMR Spectroscopy” OR “Magnetic Resonance Spectroscopy” OR “In-Vivo Spectroscopy” OR “Ex-Vivo Spectroscopy”) AND (Brain [mh] OR Neurosciences [mh] OR Neurology [mh] OR “Brain” OR “Neuroscience” OR “Neurology” OR “Phantom”) NOT (“Fingerprinting” OR “CEST” OR “Chemical Exchange Saturation Transfer” OR “ <sup>31</sup> P” OR “(31)P” OR “ <sup>13</sup> C” OR “(13)C” OR “ <sup>23</sup> Na” OR “(23)Na” OR “ <sup>17</sup> O” OR “ <sup>15</sup> N” OR “ <sup>14</sup> N” OR “ <sup>19</sup> F” OR “(19)F” OR “Systematic Review” OR “Food Storage” [mh]) |
| Relaxation    | Web of Science | ALL=((“NMR Spectroscopy” OR “Magnetic Resonance Spectroscopy” OR “In-Vivo Spectroscopy” OR “Ex-Vivo Spectroscopy”) AND (Neuroscience OR Neurosciences OR Brain                                                                                                                                                                                                                                                                                                                                                                                                                                                                                                                                                                    |

\*Corresponding Author: Craig Stark, Ph.D. (cestark@uci.edu)  
 Department of Neurobiology and Behavior, University of California, Irvine,  
 1400 Biological Sciences III, Irvine, CA 92697

|            |        |                                                                                                                                                                                                                                                                                                                                                                                                                                                                                                                                  |
|------------|--------|----------------------------------------------------------------------------------------------------------------------------------------------------------------------------------------------------------------------------------------------------------------------------------------------------------------------------------------------------------------------------------------------------------------------------------------------------------------------------------------------------------------------------------|
|            |        | OR Neurology OR Phantom) AND (“T <sub>2</sub> Relaxation” OR “Transverse Relaxation” OR “Spin-spin Relaxation” OR “Carr-Purcell Meiboom-Gill”) NOT (“Fingerprinting” OR “CEST” OR “Chemical Exchange Saturation Transfer” OR “ <sup>31</sup> P” OR “( <sup>31</sup> )P” OR “ <sup>13</sup> C” OR “( <sup>13</sup> )C” OR “ <sup>23</sup> Na” OR “( <sup>23</sup> )Na” OR “ <sup>17</sup> O” OR “ <sup>15</sup> N” OR “ <sup>14</sup> N” OR “ <sup>19</sup> F” OR “( <sup>19</sup> )F” OR “Systematic Review” OR “Food Storage”)) |
| Relaxation | Scopus | ((“magnetic resonance spectroscopy” OR “mrs” OR “ <sup>1</sup> H-mrs” OR “mrsi” OR “NMR Spectroscopy”) AND (“human”) AND (“ <sup>1</sup> H” OR “proton” OR “ <sup>1</sup> H-mrs” OR “hydrogen nucleus”) AND (“neuroscience” OR “brain”) AND (“T <sub>2</sub> Relaxation” OR “Transverse Relaxation” OR “Spin-spin Relaxation” OR “Carr-Purcell Meiboom-Gill”) AND NOT (“ <sup>13</sup> C” OR “ <sup>31</sup> P” OR “ <sup>23</sup> Na” OR “ <sup>17</sup> O” OR “Systematic Review”)))                                           |

**Supplementary Table 1.** Search queries used for each of the databases (PubMed, Web of Science, Scopus) for the Concentration and Relaxation studies.

\*Corresponding Author: Craig Stark, Ph.D. (cestark@uci.edu)  
 Department of Neurobiology and Behavior, University of California, Irvine,  
 1400 Biological Sciences III, Irvine, CA 92697
